# Supplementary material
Source: PubMed Central journal article supplement (PMC9667626)
Supplement: 13054_2022_4204_MOESM1_ESM.pdf [file 13054_2022_4204_MOESM1_ESM.pdf]

**Additional file**

**Safety, efficacy, and pharmacokinetics of gremubamab (MEDI3902), an anti *Pseudomonas aeruginosa* bispecific human monoclonal antibody, in *P. aeruginosa* colonised, mechanically ventilated intensive care unit patients: a randomised controlled trial**

*Jean Chastre, Bruno François, Marc Bourgeois, Apostolos Komnos, Ricard Ferrer, Galia Rahav, Nicolas De Schryver, Alain Lepape, Ifthar Koksai, Charles-Edouard Luyt, Miguel Sánchez-García, Antoni Torres, Philippe Eggimann, Despoina Koulenti, Thomas L. Holland, Omar Ali, Kathryn Shoemaker, Pin Ren, Julien Sauser, Alexey Ruzin, David E. Tabor, Ahmad Akhgar, Yuling Wu, Yu Jiang, Antonio DiGiandomenico, Susan Colbert, Drieke Vandamme, Frank Coenjaerts, Surbhi Malhotra-Kumar, Leen Timbermont, Antonio Oliver, Olivier Barraud, Terramika Bellamy, Marc Bonten, Herman Goossens, Colin Reisner, Mark T. Esser, and Hasan S. Jafri, on behalf of The COMBACTE-MAGNET EVADÉ Study Group*

**Corresponding author:**

Professor Jean Chastre, Service de Médecine Intensive Réanimation, Institut de Cardiologie, Groupe Hospitalier Pitié-Salpêtrière, 47–83 Bd de l’Hôpital, 75651 Paris, France. Telephone: +33 615446324; Email: [jean.chastre@aphp.fr](mailto:jean.chastre@aphp.fr)

**Alternate corresponding author:**

Hasan S. Jafri, MD, Senior Director, Clinical Research and Development, Vaccines and Immune Therapies, AstraZeneca Biopharmaceuticals, One MedImmune Way, Gaithersburg, MD 20878, USA; Email: [hasan.jafri.md@gmail.com](mailto:hasan.jafri.md@gmail.com)

**Journal:** Intensive Care Medicine

**Contents:**

- **Supplementary Methods**
  - *Inclusion/exclusion criteria*
  - *Criteria for diagnosis of P. aeruginosa pneumonia*
  - *Post-hoc analyses*
  - *Exploratory endpoints*
  - *Specimen collection and schedule of study procedures for exploratory endpoints*
- **Supplementary Results**
  - *Exploratory efficacy analyses*
  - *Exploratory biomarker analyses*
- **Supplementary table 1: Number of randomised subjects by country**
- **Supplementary table 2: List of participating principal investigators by country and site**
- **Supplementary table 3: Ventilator-associated pneumonia prevention measures used in placebo and MEDI3902 patients (mITT)**
- **Supplementary table 4: Healthcare resource utilisation through 21 days post-dose for subjects with and without EAC-determined PA pneumonia**
- **Supplementary table 5: Incidence (n, %) of serious PA disease through 21 days post-dose by event attributable to PA**
- **Supplementary table 6: Subjects with PA pneumonia (not EAC-determined) with anti-PA effective antibiotics, which overlap the adverse event as-treated population**
- **Supplementary tables 7A and 7B: PA pneumonia incidence by procalcitonin and absolute neutrophil count quartiles at baseline – (mITT)**
- **Supplementary table 8: Severity scores (mean [standard deviation]) related to first EAC-determined PA pneumonia through 21 days post-dose in subjects with EAC-determined PA pneumonia**
- **Supplementary table 9: Change from baseline (mean [standard deviation]) in cellular and protein markers of inflammation through day 8 (all subjects, mITT)**
- **Supplementary table 10: Change from baseline in cellular and protein markers of inflammation through day of clinical resolution for subjects with EAC-determined P. aeruginosa pneumonia (mITT)**
- **Supplementary table 11: Subgroups by Baseline Disease (mITT)**
- **Supplementary figure 1: Study design.**
- **Supplementary figure 2: Cumulative incidence function for EAC-determined PA pneumonia with death as a completing risk (mITT).**
- **Supplementary figure 3: Impact of baseline covariates on MEDI3902 efficacy against PA pneumonia in the overall study (post-hoc analysis, mITT).**
- **Supplementary figure 4: Correlation between anti-cytotoxicity (a) or opsonophagocytic killing activity (b) and serum concentrations of MEDI3902 following 1500 mg dosing.**
- **Supplementary figure 5: MEDI3902 1500 mg endotracheal aspirate pharmacokinetic (PK) by visit.**
- **Supplementary figure 6: Exposure–response relationship between MEDI3902 1500 mg AUC<sub>0–21</sub> and the likelihood of developing PA pneumonia.**

**Supplementary Methods**

***Inclusion/exclusion criteria***

*Inclusion criteria*

Subjects must have met all of the following criteria:

- Male or female 18 years of age or older at the time of study entry
- Written informed consent and any locally required authorisation obtained from the subject/legal representative before performing any protocol-related procedures, including screening assessments
- Females of childbearing potential who are sexually active with a non-sterilised male partner must have had evidence of not being pregnant upon enrolment and have a negative pregnancy test before the administration of the investigational product. Females of childbearing potential were defined as those who are not surgically sterile (i.e., bilateral oophorectomy or complete hysterectomy) or those who are not premenarchal or postmenopausal (defined as 12 months with no menses without an alternative medical cause)
- Currently intubated and on mechanical ventilation in the intensive care unit
- Tracheal sample collected and positive by polymerase chain reaction (PCR) for *Pseudomonas aeruginosa* (PA) within 36 hours before randomisation
- Expected to remain intubated and mechanically ventilated for at least 72 hours based on investigator estimate
- No diagnosis of new-onset pneumonia within 72 hours before randomisation (subjects with evidence of resolved pneumonia will be eligible)
- Expected to survive for >2 weeks based on investigator judgement
- Expected to participate in the study through 49 days post-dose

*Exclusion criteria*

Any of the following excluded the subject from participation in the study:

- Acute confirmed or suspected pseudomonal disease at study enrolment and investigational product dosing (endotracheal colonisation is acceptable and required [see inclusion criterion 5])
- Clinical Pulmonary Infection Score of at least 6 based on contributing parameters measured within the past 24 hours, before investigational product dosing
- Active pulmonary disease that would impair the ability to diagnose pneumonia, such as active tuberculosis or fungal disease, obstructing lung cancer, large pleural effusion or empyema, cystic fibrosis, or acute respiratory distress syndrome with lung “white out”
- Subjects who were tracheostomy-dependent before current hospital admission
- Receipt of anti-PA antibiotics (systemic colistin or aerosolised colistin) for > 72 hours within 96 hours before randomisation or anticipated ongoing receipt of the anti-PA antibiotics
- Burns >40% body surface area

## *EVADE MEDI3902*

- An Acute Physiology and Chronic Health Evaluation-II (APACHE-II) score of at least 25 or a Sequential Organ Failure Assessment (SOFA) score of at least 12 at the time of randomisation. Vasopressors only used to improve cerebral perfusion pressure (e.g., subarachnoid haemorrhage) were not to be used to calculate the cardiovascular component of the SOFA score
- Receipt of any investigational drug therapy within 30 days before investigational product dosing
- Previous receipt of a mAb
- Subjects with human immunodeficiency virus (HIV) infection who did not have well-controlled HIV infection in the investigator's opinion. Subjects with a history of HIV infection who had been on highly active antiretroviral therapy and were asymptomatic from HIV infection for at least 6 months were permitted to be enrolled
- Lymphoma not in complete remission and on chemotherapy
- Recipients of bone marrow, stem cell, or solid organ transplant who were not currently in complete remission
- Receipt of chemotherapy or other immunosuppressive drugs including glucocorticoid therapy (prednisone 20 mg or equivalent, daily or every other day for 30 days) in the previous 2 months
- History of known hypersensitivity to any component of the investigational product
- Pregnant or nursing female

### ***Criteria for diagnosis of *P. aeruginosa* pneumonia***

Subjects had to meet all the following three criteria (radiographic, clinical, and microbiological) to be diagnosed with *P. aeruginosa* pneumonia:

- Radiographic – new or worsening infiltrate consistent with pneumonia on chest X-ray, as diagnosed by a qualified radiologist within 24 hours of the event
- Clinical – at least two of the following minor or one major new-onset respiratory sign or symptom:
  - Minor criteria: at least one systemic sign of infection, including abnormal temperature (oral or tympanic temperature  $>38^{\circ}\text{C}$  or a core temperature of  $<35^{\circ}\text{C}$  or at least  $38.3^{\circ}\text{C}$ ), and/or abnormal white blood cell (WBC) count (WBC count  $<4500$  cells/ $\text{mm}^3$ ,  $>10,000$  cells/ $\text{mm}^3$ , or  $>15\%$  band neutrophils); production of new purulent endotracheal secretions; new physical examination findings consistent with pneumonia/pulmonary consolidation such as auscultatory findings (e.g., rales, rhonchi, and bronchial breath sounds) or dullness to percussion
  - Additional minor criteria in subjects who were no longer mechanically ventilated included a new-onset or worsening cough, production of purulent sputum, pleuritic chest pain, dyspnoea, tachypnoea (respiratory rate  $>30$  breaths/minute), or hypoxaemia defined as oxygen ( $\text{O}_2$ ) saturation  $<90\%$  or  $\text{PaO}_2 <60$  mm Hg on room air if lower than baseline, or a need to initiate or increase sustained (at least 3 hours) supplemental  $\text{O}_2$  to maintain pre-event baseline saturations
  - Major criteria for mechanically ventilated subjects: acute changes made in the ventilatory support system to enhance oxygenation, as determined by a  $\text{PaO}_2/\text{FiO}_2$  ratio  $<240$  mm Hg

## *EVADE MEDI3902*

maintained for at least 4 hours or a decrease in PaO<sub>2</sub>/FiO<sub>2</sub> by at least 50 mm Hg maintained for at least 4 hours

- Major criteria for subjects who were no longer mechanically ventilated: a need to initiate non-invasive or re-initiate invasive mechanical ventilation due to respiratory failure or worsening respiratory status
- Microbiologic confirmation by at least one of the following within 24 hours of the onset of the event:
  - Respiratory specimen positive for *P. aeruginosa* by culture of a respiratory secretion obtained by endotracheal aspiration or bronchoscopy in intubated subjects, by bronchoscopy in non-mechanically ventilated subjects (if obtained as part of necessary clinical management), and by expectorated sputum in subjects who were not intubated but met the protocol definition of mechanical ventilation
  - Blood culture positive for *P. aeruginosa* in the absence of a primary source of infection outside of the lung
  - Pleural fluid aspirate or lung tissue culture positive for *P. aeruginosa* during an episode of pneumonia if obtained as part of a subject's necessary clinical management

### ***Post-hoc analyses***

#### *Adjusted post-hoc analysis of the primary efficacy endpoint*

The adjusted analysis objective was to estimate the effect of MEDI3902 1500mg compared to placebo on the incidence of EAC-determined PA pneumonia within 21 days post-dose adjusted for baseline covariates. Inverse probability of treatment weighting was used to address possible selection bias due to baseline imbalance. The weights were computed for each patient using propensity score (PS). The PS represents the probability of a patient to be assigned to the intervention arm, given a set of explanatory variables. The analysis was adjusted for the following baseline variables:

- Age in years
- Gender (male or female)
- Body mass index in kg/m<sup>2</sup>
- Pre-existing comorbidities (chronic obstructive pulmonary disease, congestive heart failure, coronary artery disease, angina, history of angioplasty, peripheral vascular disease, cerebrovascular disease, hypertension, chronic liver disease, diabetes, pulmonary artery hypertension, renal insufficiency, thoracic malignancy, and known immunodeficiencies)
- Reason for ICU admission (cardiovascular disorders, infection, neurologic disorders, post-operative, respiratory disease, and other)
- Duration of previous mechanical ventilation in days
- Previous episode of PA infections (yes or no)
- SOFA score
- PA bacterial load (Ct value)
- Procalcitonin concentration in µg/L
- C-reactive protein concentration in mg/dL
- Absolute neutrophil count in 10<sup>3</sup>/µL

A sensitivity analysis was done with the addition of the centre to the variables mentioned above. The PS was computed using generalised boosted regression. Weighted Poisson regression with robust variance was then applied to estimate the treatment effect. The weights are 1/PS for subjects in the intervention arm and 1/(1 – PS) for the subjects in the placebo arm, meaning that more weights are given to subjects that were less likely to be randomised to the arm they were. To account for missing data, multiple imputation was applied using 20 imputed datasets. The analyses were done using the

## *EVADE MEDI3902*

modified intention-to-treat (mITT) population, and results are shown for MEDI3902 1500 mg compared to placebo.

### *Post-hoc analyses of baseline covariates*

The methodology and rationale for performing the post-hoc analyses followed the sequential process: i) we observed that the MEDI3902 arm appeared to have higher baseline inflammation compared with the placebo arm, with particularly higher WBC counts, absolute neutrophil counts, and procalcitonin concentrations in the MEDI3902 arm; ii) we then decided to examine the impact of the baseline covariates (such as previous mechanical ventilation duration, physiology scores, PCR Ct value as a measure of PA load, procalcitonin concentrations, absolute neutrophil counts, and WBC counts) on efficacy for PA pneumonia – we noticed that procalcitonin concentrations and absolute neutrophil counts had the greatest impact on the relative risk reduction (RRR) of PA pneumonia; iii) we then decided to perform the quartile analyses (a statistically sound way to examine the effect over the quantitative range) on the baseline procalcitonin concentrations and absolute neutrophil counts. The groups with high and statistically significant RRR with the baseline levels of  $\leq 0.55$   $\mu\text{g/L}$  for procalcitonin and  $\leq 8.17 \times 10^3$  cells/ $\mu\text{L}$  for absolute neutrophil count correspond to combined quartiles 1–3 for procalcitonin and combined quartiles 1–2 for absolute neutrophil count.

### *Exploratory endpoints*

Exploratory efficacy endpoints included: tracheal PA colonisation status through 21 days post-dose; incidence of all-cause nosocomial pneumonia through 21 days post-dose; incidence of PA tracheobronchitis through 21 days post-dose; incidence of nosocomial pneumonia caused by PA through 28 days post-dose; incidence of serious PA disease summarised through 21 days post-dose as measured by pneumonia, bacteraemia, intra-abdominal infection, deep skin or tissue infection, meningitis, or death attributable to PA; healthcare resource utilisation (days of hospital stay, days of ICU stay, days of mechanical ventilation, and number of days of antibiotic usage, number of chest computed tomography scans, and use of post-hospital discharge resources) through 21 and 49 days post-dose; severity of breakthrough nosocomial pneumonia caused by PA measured by days of mechanical ventilation, CPIS, and SOFA score through 21 days post-dose; all-cause mortality through 28 days post-onset of breakthrough nosocomial *P. aeruginosa* pneumonia; all-cause mortality through 49 days post-dose.

Exploratory pharmacokinetics (PK)/pharmacodynamics and biomarker endpoints included: MEDI3902 concentration and PK parameters in tracheal secretions through 21 days post-dose; cellular and protein markers of inflammation (WBC count and differential blood count in blood and procalcitonin and C-reactive protein [CRP] in serum) at baseline through 7 days post-dose in all subjects and through 49 days post-dose in subjects with suspected or documented serious *P. aeruginosa* infections; *ex vivo* anti-cytotoxicity and opsonophagocytic activity before and after administration of MEDI3902.

### *Specimen collection and schedule of study procedures for exploratory endpoints*

Tracheal aspirate samples were collected to assess MEDI3902 PK in the lower respiratory tract from intubated subjects pre-dose on day 1 and on days 2, 4, 8, 15, and 22 of follow-up and the day of extubation if this occurred between scheduled assessments. Tracheal aspirate samples to assess for *P. aeruginosa* colonisation were collected within 36 hours before randomisation. Tracheal aspirate samples were collected to assess *P. aeruginosa* colonisation status by PCR on days 4, 8, 15, and 22, provided the subject remained intubated. While the subject was intubated, tracheal aspirate was also assessed for colonisation by PCR on day 1 of infection in subjects with suspected or confirmed pneumonia or bacteraemia and on day 4 of infection in subjects who were positive for *P. aeruginosa* bacteraemia or *P. aeruginosa* pneumonia. Blood samples for culture were taken pre-dose on day 1, and tracheal aspirate samples for culture were taken on days 2 and 4. Blood and serum for cellular and protein markers of inflammation were collected in all subjects pre-dose on day 1 and on day 8, in subjects with suspected or confirmed *P. aeruginosa* infections on day 1 of infection, and in those who

## *EVADE MEDI3902*

were positive for *P. aeruginosa* bacteraemia or pneumonia on day 4 and day 5 post-infection through clinical resolution. Serum *ex vivo* anti-cytotoxicity and opsonophagocytic activity were assessed for all subjects before administration of MEDI3902 on day 1 and on days 2, 8, 15, 22, and 29, for subjects with suspected or confirmed pneumonia or bacteraemia on day 1 of infection, and for those who were positive for *P. aeruginosa* bacteraemia or pneumonia on day 4 and day 5 post-infection through clinical resolution.

## **Supplementary Results**

### *Exploratory efficacy analyses*

The incidence of positive PA colonisation through 21 days post-dose was numerically lower in the MEDI3902 1500 mg group (86.5% [32/37]) compared with that of the placebo group (91.8% [45/49]). The incidence of EAC-determined all-cause pneumonia through 21 days post-dose was numerically higher in the MEDI3902 1500 mg group (29.4% [25/85]) compared with the placebo group (20.5% [17/83]), with a corresponding RRR of -43.6% (80% CI -104.0%, -1.1%). Very few subjects had EAC-determined PA tracheobronchitis (1500 mg n=4; placebo n=1), with an RRR for MEDI3902 1500 mg of -290.6% (80% CI -1514.5%, 5.5%) compared to placebo. The incidence of EAC-determined *P. aeruginosa* pneumonia through 28 days post-dose was similar between the MEDI3902 1500 mg group (23.5% [20/85]) and the placebo group (22.9% [19/83]), with a slight risk increase for MEDI3902 1500 mg versus placebo (RRR of -2.8% [80% CI -47.3%, 28.3%]).

In subjects who had at least one serious PA infection, a single dose of MEDI3902 1500 mg resulted in an RRR of -13.9% (80% CI -53.3%, 15.3%) compared to placebo. The incidence of serious PA disease through 21 days post-dose by event attributable to PA is shown in supplementary table 3.

Healthcare resource utilisation through 21 days post-dose for subjects with and without EAC-determined PA pneumonia is shown in supplementary table 4.

Severity scores related to first EAC-determined PA pneumonia through 21 days post-dose are shown in supplementary table 8.

Mortality rates through 28 days post-onset of breakthrough nosocomial pneumonia caused by *P. aeruginosa* were higher in the MEDI3902 1500 mg group (47.4% [9/19]) compared with those of the placebo group (33.3% [5/15]). The incidence of all-cause mortality through 49 days post-dose was numerically higher in the MEDI3902 1500 mg group (28.2% [24/85]) compared with that of the placebo group (22.9% [19/83]). A single dose of MEDI3902 1500 mg resulted in a risk increase versus placebo for all-cause mortality through 49 days post-dose (RRR of -23.3% [80% CI -73.3%, 12.2%]).

In the post-hoc analysis, the RRR (80% CI) in all-cause mortality for MEDI3902 1500 mg versus placebo of 56.5% (11.9, 79.4%) among subjects with ANC  $\leq 8.17 \times 10^3$  cells/ $\mu$ L was greater than that observed in the overall population ( $p=0.11$ ; mortality of 11.1% for MEDI3902 [n=4/36], versus 25.5% [n=12/47] for placebo). A post-hoc analysis adjusted for imbalance in baseline covariates resulted in an RRR of -20.8% (80% CI: -81.1%, 19.4%;  $p=0.55$ ), and a sensitivity analysis examining the effect of study centre as an additional variable resulted in an RRR of -20.4% (80% CI: -80.6%, 19.8%;  $p=0.56$ ).

### **Exploratory biomarker analyses**

#### *Cellular and protein markers of inflammation*

There were trends towards larger changes from baseline to day 8 in the concentrations of procalcitonin and CRP in the MEDI3902 1500 mg group compared with the placebo group. In contrast, WBC and differential blood counts remained largely unchanged (supplementary table 9).

### *EVADE MEDI3902*

Change from baseline in cellular and protein markers of inflammation through day of clinical resolution for subjects with EAC-determined PA is shown in supplementary table 10.

### *Anti-cytotoxicity and opsonophagocytic activity*

A positive correlation was observed between *ex vivo* anti-cytotoxicity and serum concentrations of MEDI3902 1500 mg (supplementary figure 4a; R-square=0.61). Similarly, opsonophagocytic killing activity was positively correlated with serum concentrations of MEDI3902 (supplementary figure 4b; R-square=0.64).



*EVADE MEDI3902*

*Supplementary table 1: Number of randomised subjects by country*

| <b>Country (# of sites)</b> | <b>MEDI3902 500 mg<br/>N=16</b> | <b>MEDI3902 1500 mg<br/>N=87</b> | <b>Placebo<br/>N=85</b> |
|-----------------------------|---------------------------------|----------------------------------|-------------------------|
| Austria (2)                 | 0                               | 0                                | 2                       |
| Belgium (5)                 | 4                               | 12                               | 12                      |
| Croatia (1)                 | 0                               | 1                                | 3                       |
| Czech Republic (3)          | 0                               | 2                                | 1                       |
| France (13)                 | 6                               | 34                               | 34                      |
| Greece (5)                  | 3                               | 8                                | 8                       |
| Hungary (2)                 | 1                               | 3                                | 2                       |
| Israel (1)                  | 0                               | 4                                | 4                       |
| Portugal (1)                | 0                               | 1                                | 1                       |
| Spain (8)                   | 2                               | 13                               | 10                      |
| Turkey (3)                  | 0                               | 5                                | 4                       |
| United Kingdom (2)          | 0                               | 2                                | 3                       |
| United States (2)           | 0                               | 2                                | 1                       |

**Supplementary table 2: List of participating principal investigators by country and site**

| <b>Country</b> | <b>Investigator name</b> | <b>Hospital</b>                                                      |
|----------------|--------------------------|----------------------------------------------------------------------|
| Austria        | Michael Joannidis        | Medical University of Innsbruck                                      |
| Austria        | Walter Klimscha          | SMZOST Donauspital Wien                                              |
| Belgium        | Elisabeth De Waele       | UZ Brussel                                                           |
| Belgium        | Nicolas De Schryver      | Clinique Saint-Pierre                                                |
| Belgium        | Jacques Devriendt        | CHU Brugmann                                                         |
| Belgium        | Vincent Huberlant        | Centre Hospitalier Jolimont-Lobbes                                   |
| Belgium        | Pieter Depuydt           | University Hospital Gent                                             |
| Belgium        | Marc Bourgeois           | AZ Sint-Jan AV                                                       |
| Belgium        | Sam Van Boxstael         | Ziekenhuis Oost-Limburg                                              |
| Croatia        | Mladen Peric             | Klinicki Bolnicki Centar Zagreb                                      |
| Croatia        | Jasminka Kopic           | General Hospital Dr Josip Benčević                                   |
| Czech Republic | Michal Hanauer           | Krajská zdravotní, a.s. – Nemocnice Decín, o.z.                      |
| Czech Republic | Tomas Hruby              | Krajská zdravotní, a.s. – Nemocnice Teplice, o.z.                    |
| Czech Republic | Vladimir Sramek          | Fakultní nemocnice u sv. Anny v Brně                                 |
| Czech Republic | Petr Svoboda             | Nemocnice Kyjov, příspěvková organizace                              |
| Czech Republic | Tomas Vymazal            | Fakultní nemocnice v Motole                                          |
| Czech Republic | Martin Nováček           | Oblastní nemocnice Kolin, a.s.                                       |
| France         | Bruno François           | Centre Hospitalier et Universitaire de Limoges                       |
| France         | Djillali Annane          | APHP Raymond-Poincaré de Garches                                     |
| France         | Jean Chastre             | Groupe Hospitalier Pitié Salpêtrière                                 |
| France         | Jean-Paul Mira           | APHP Cochin                                                          |
| France         | Bertrand Souweine        | Centre Hospitalier Universitaire de Clermont Ferrand                 |
| France         | Pierre-François Dequin   | CHRU de Tours                                                        |
| France         | Ferhat Meziani           | Nouvel Hôpital Civil Strasbourg                                      |
| France         | François Stephan         | Centre Chirurgical Marie Lannelongue                                 |
| France         | Saadalla Nseir           | CHRU Lille                                                           |
| France         | Sebastien Gibot          | CHRU Nancy                                                           |
| France         | Carole Schwebel          | Hôpital Albert Michallon La Tronche                                  |
| France         | Alain Lepape             | Centre Hospitalier Lyon Sud                                          |
| France         | Gaetan Plantefeve        | Centre Hospitalier Victor Dupouy                                     |
| France         | Jean-Luc Diehl           | APHP Hôpital Européen Georges-Pompidou                               |
| France         | Christian Richard        | APHP Hôpital de Bicêtre                                              |
| France         | Christian Lamer          | Institut Mutualiste Montsouris                                       |
| France         | Kada Klouche             | Centre Hospitalier Universitaire de Montpellier/ Lapeyronie hospital |
| France         | Samir Jaber              | Centre Hospitalier Universitaire de Montpellier/ Hôpital St Eloi     |
| Greece         | Epaminondas Zakyntinos   | University Hospital of Larissa                                       |
| Greece         | Georgios Filntisis       | Agioi Anargyroi Cancer Hospital                                      |
| Greece         | Apostolos Komnos         | General Hospital of Larissa                                          |
| Greece         | Spyros Zakyntinos        | Evangelismos General Hospital of Athens                              |

|                |                               |                                                                     |
|----------------|-------------------------------|---------------------------------------------------------------------|
| Greece         | Antonia Koutsoukou            | Sotiria Chest Hospital of Athens                                    |
| Greece         | Georgios Saroglou             | Metropolitan Hospital                                               |
| Greece         | Charikleia Nikolaou           | Konstantopouleion General Hospital of Athens                        |
| Greece         | Glykeria Vlachogianni         | Agios Dimitrios General Hospital of Thessaloniki                    |
| Greece         | Ioannis Pnevmatikos           | University Hospital of Alexandroupolis                              |
| Greece         | Konstantinos Mandragos        | General Hospital of Athens Korgialenio Benakio Greek Red Cross      |
| Hungary        | Ildiko Kremer                 | Pest Megyei Flór Ferenc Kórház                                      |
| Hungary        | Zsolt Dezso Rozgonyi          | Orszagos Koranyi TBC es Pulmonologiai Intezet                       |
| Hungary        | Zsuzsa Marjanek               | Jávorszky Ödön Kórház                                               |
| Ireland        | Ignacio Martin-Loeches        | St James University Hospital                                        |
| Israel         | Pierre Singer                 | Rabin Medical Center                                                |
| Israel         | Vernon Van Heerden            | Hadasah Medical Center                                              |
| Israel         | Yehuda Carmeli                | Tel Aviv Sourasky Medical Center                                    |
| Israel         | Galia Rahav                   | Chaim Sheba Medical Center                                          |
| Portugal       | Pedro Pova                    | Centro Hospital de Lisboa Ocidental – Hospital São Francisco Xavier |
| Portugal       | Antonio Alvarez Seoane        | Centro Hospitalar Lisboa Norte, E.P.E. – Hospital de Santa Maria    |
| Portugal       | Pedro Moura                   | Unidade Local de Saúde do Alto Minho, EPE                           |
| Portugal       | Filipe Gonzalez               | Hospital Garcia de Orta                                             |
| Spain          | Paula Ramirez                 | Hospital Universitari i Politecnic La Fe de Valencia                |
| Spain          | Antonio Torres Marti          | Hospital Clinic de Barcelona                                        |
| Spain          | Miguel Sánchez-García         | Hospital Clínico San Carlos Madrid                                  |
| Spain          | Ricard Ferrer Roca            | Hospital Universitario Vall d'Hebron Barcelona                      |
| Spain          | Lorena Oteiza                 | Hospital Universitario de Getafe Madrid                             |
| Spain          | Dolores Escudero              | Hospital Universitario Central de Asturias Oviedo                   |
| Spain          | Enrique Piacentini            | Hospital Mutua de Terrassa Barcelona                                |
| Spain          | Paula Vera                    | Hospital de La Santa Creu i Sant Pau                                |
| Spain          | Luis Tamayo                   | Hospital Universitario del Rio Hortega                              |
| Spain          | Miguel Angel Gonzalez Gallego | Hospital Universitario Infanta Sofia                                |
| Spain          | Borja Suberviola Canas        | Hospital Universitario Marqués de Valdecilla                        |
| Spain          | Iglesias Figueira             | Hospital Universitario La Paz – PPDS                                |
| Spain          | Rafael Leon                   | Hospital General Universitario Reina Sofia                          |
| Turkey         | Volkan Korten                 | Marmara University Research and Training Hospital                   |
| Turkey         | Iftihar Koksai                | Karadeniz Technical University Faculty of Medicine                  |
| Turkey         | Murat Akova                   | Hacettepe Universitesi Tip Fakultesi Hastanesi                      |
| United Kingdom | Duncan Wyncoll                | St Thomas' Hospital                                                 |
| United Kingdom | Tony Whitehouse               | Queen Elizabeth Hospital                                            |
| United Kingdom | Phil Hopkins                  | King's College Hospital                                             |
| United Kingdom | Malcolm Sim                   | Southern General Hospital                                           |
| United States  | Yoav Golan                    | Tufts University Medical Center                                     |
| United States  | Marcus Zervos                 | Henry Ford Health Sys. Detroit                                      |
| United States  | Jose Vazquez                  | Georgia Regents Medical Center-Augusta                              |

|               |                      |                                       |
|---------------|----------------------|---------------------------------------|
| United States | Kartikeya Cherabuddi | University of Florida                 |
| United States | George Smulian       | Univ. of Cincinnati                   |
| United States | Nadine Rouphael      | Emory University Atlanta              |
| United States | James Welker         | Anne Arundel Health                   |
| United States | Mathew Sims          | Beaumont Hospital Royal Oaks          |
| United States | David Van Duin       | UNC Chapel Hill                       |
| United States | Todd McCarthy        | Univ. of Alabama, Birmingham          |
| United States | Christopher Polk     | Carolina Medical Center/Atrium Health |

Supplementary table 3: Ventilator-associated pneumonia prevention measures used in placebo and MEDI3902 patients (mITT)

| VAP prevention measures                                          | MEDI3902<br>500 mg<br>n = 16 | MEDI3902<br>1500 mg<br>n = 85 | Placebo<br>n = 83 | MEDI3902<br>Total<br>n = 101 | Total<br>n = 184 |
|------------------------------------------------------------------|------------------------------|-------------------------------|-------------------|------------------------------|------------------|
| Elevation of the head of the bed                                 |                              |                               |                   |                              |                  |
| Yes                                                              | 14 (87.5%)                   | 82 (96.5%)                    | 82 (98.8%)        | 96 (95.0%)                   | 178 (96.7%)      |
| No                                                               | 2 (12.5%)                    | 3 (3.5%)                      | 1 (1.2%)          | 5 (5.0%)                     | 6 (3.3%)         |
| Missing                                                          | 0                            | 0                             | 0                 | 0                            | 0                |
| Daily sedation vacations and assessment of readiness to extubate |                              |                               |                   |                              |                  |
| Yes                                                              | 16 (100%)                    | 57 (67.1%)                    | 56 (67.5%)        | 73 (72.3%)                   | 129 (70.1%)      |
| No                                                               | 0                            | 28 (32.9%)                    | 27 (32.5%)        | 28 (27.7%)                   | 55 (29.9%)       |
| Missing                                                          | 0                            | 0                             | 0                 | 0                            | 0                |
| Peptic ulcer disease prophylaxis                                 |                              |                               |                   |                              |                  |
| Yes                                                              | 16 (100%)                    | 73 (85.9%)                    | 69 (83.1%)        | 89 (88.1%)                   | 158 (85.9%)      |
| No                                                               | 0                            | 12 (14.1%)                    | 14 (16.9%)        | 12 (11.9%)                   | 26 (14.1%)       |
| Missing                                                          | 0                            | 0                             | 0                 | 0                            | 0                |
| Deep venous thrombosis prophylaxis                               |                              |                               |                   |                              |                  |
| Yes                                                              | 15 (93.8%)                   | 78 (91.8%)                    | 77 (92.8%)        | 93 (92.1%)                   | 170 (92.4%)      |
| No                                                               | 1 (6.3%)                     | 7 (8.2%)                      | 6 (7.2%)          | 8 (7.9%)                     | 14 (7.6%)        |
| Missing                                                          | 0                            | 0                             | 0                 | 0                            | 0                |
| Daily oral care with chlorhexidine                               |                              |                               |                   |                              |                  |
| Yes                                                              | 11 (68.8%)                   | 69 (81.2%)                    | 61 (73.5%)        | 80 (79.2%)                   | 141 (76.6%)      |
| No                                                               | 5 (31.3%)                    | 16 (18.8%)                    | 22 (26.5%)        | 21 (20.8%)                   | 43 (23.4%)       |
| Missing                                                          | 0                            | 0                             | 0                 | 0                            | 0                |
| All 5 measures used                                              |                              |                               |                   |                              |                  |
| Yes                                                              | 8 (50.0%)                    | 36 (42.4%)                    | 31 (37.3%)        | 44 (43.6%)                   | 75 (40.8%)       |
| No                                                               | 8 (50.0%)                    | 49 (57.6%)                    | 52 (62.7%)        | 57 (56.4%)                   | 109 (59.2%)      |
| Missing                                                          | 0                            | 0                             | 0                 | 0                            | 0                |

mITT = modified intent-to-treat population; VAP = ventilator-associated pneumonia

**Supplementary table 4: Healthcare resource utilisation through 21 days post-dose for subjects with and without EAC-determined PA pneumonia**

|                           | Duration (days) per 22 patient-days of follow-up for subjects without PA pneumonia |                   | Duration (days) per 22 patient-days of follow-up for subjects with PA pneumonia |                   |
|---------------------------|------------------------------------------------------------------------------------|-------------------|---------------------------------------------------------------------------------|-------------------|
|                           | MEDI3902<br>1500 mg<br>(n=66)                                                      | Placebo<br>(n=68) | MEDI3902<br>1500 mg<br>(n=19)                                                   | Placebo<br>(n=15) |
| Hospitalisation           | 21.3                                                                               | 21.0              | 21.7                                                                            | 22.0              |
| ICU stay                  | 17.6                                                                               | 18.2              | 20.6                                                                            | 21.7              |
| Mechanical ventilation    | 13.1                                                                               | 15.1              | 17.5                                                                            | 19.7              |
| Supplemental oxygen       | 6.5                                                                                | 5.4               | 5.0                                                                             | 5.5               |
| Anti-PA antibiotic usage  | 3.1                                                                                | 3.0               | 1.2                                                                             | 1.4               |
| Systemic antibiotic usage | 7.5                                                                                | 10.5              | 12.3                                                                            | 14.4              |

EAC=Endpoint Adjudication Committee. PA=*Pseudomonas aeruginosa*. ICU=intensive care unit.

Duration per 22 patient-days of follow-up time = (total duration of healthcare resource utilisation measure/sum of follow-up time) × 22 days.

**Supplementary table 5: Incidence (n, %) of serious PA disease through 21 days post-dose by event attributable to PA**

|                                | <b>MEDI3902<br/>1500 mg<br/>(n=85)</b> | <b>Placebo<br/>(n=83)</b> |
|--------------------------------|----------------------------------------|---------------------------|
| Tracheobronchitis              | 4 (4.7%)                               | 1 (1.2%)                  |
| Bacteraemia                    | 6 (7.1%)                               | 4 (4.8%)                  |
| Deep skin or tissue infection* | 0                                      | 3 (3.6%)                  |
| Intra-abdominal infection*     | 1 (1.2%)                               | 2 (2.4%)                  |
| Meningitis*                    | 1 (1.2%)                               | 0                         |

PA=*Pseudomonas aeruginosa*.

\*Serious PA infections obtained through medical monitor review of adverse events.

**Supplementary table 6: Subjects with PA pneumonia (not EAC-determined) with anti-PA effective antibiotics, which overlap the adverse event as-treated population**

|                             | <b>Placebo</b>  | <b>MEDI3902<br/>500mg</b> | <b>MEDI3902<br/>1500 mg</b> | <b>MEDI3902<br/>Total</b> |
|-----------------------------|-----------------|---------------------------|-----------------------------|---------------------------|
|                             | <b>n = 83</b>   | <b>n = 16</b>             | <b>n = 85</b>               | <b>n = 101</b>            |
| Infectious pleural effusion | 0               | 0                         | 1 (1.2%)                    | 1 (1.0%)                  |
| Lung infection pseudomonal  | 0               | 0                         | 1 (1.2%)                    | 1 (1.0%)                  |
| Pneumonia bacterial         | 1 (1.2%)        | 1 (6.3%)                  | 0                           | 1 (1.0%)                  |
| Pneumonia pseudomonal       | 3 (3.2%)        | 0                         | 0                           | 0                         |
| Pseudomonas infection       | 0               | 0                         | 1 (1.2%)                    | 1 (1.0%)                  |
| <b>Total</b>                | <b>4 (4.8%)</b> | <b>1 (6.3%)</b>           | <b>2 (2.4%)</b>             | <b>3 (3.0%)</b>           |

EAC=Endpoint Adjudication Committee. PA=*Pseudomonas aeruginosa*.

Subjects are counted only once regardless of the number of events



**Supplementary tables 7A and 7B: PA pneumonia incidence by procalcitonin and absolute neutrophil count quartiles at baseline – (mITT)****Table 7A**

| <b>Procalcitonin levels at baseline</b>          | <b>MEDI3902<br/>1500mg</b> | <b>Placebo</b> | <b>Relative Risk<br/>Reduction</b> | <b>80% Confidence Interval</b> |
|--------------------------------------------------|----------------------------|----------------|------------------------------------|--------------------------------|
| Quartile 1: $\leq 0.1$ $\mu\text{g/L}$           | 2/21 (9.5%)                | 2/20 (10.0%)   | 4.80%                              | -238.7% to 72.2%               |
| Quartile 2: $>0.1 - \leq 0.2$ $\mu\text{g/L}$    | 2/18 (11.1%)               | 4/17 (23.5%)   | 52.80%                             | -40.0% to 83.1%                |
| Quartile 3: $>0.2 - \leq 0.55$ $\mu\text{g/L}$   | 3/17 (17.6%)               | 8/22 (36.4%)   | 51.50%                             | -4.4% to 79.8%                 |
| Quartile 4: $> 0.55$ $\mu\text{g/L}$             | 9/21 (42.9%)               | 0/15 (0.0%)    | NA                                 | NA                             |
| Procalcitonin level: $\leq 0.55$ $\mu\text{g/L}$ | 7/56 (12.5%)               | 14/59 (23.7%)  | 47.3%                              | 6.1% to 69.9%                  |

**Table 7B**

| <b>ANC count at Baseline</b>                            | <b>MEDI3902<br/>1500mg</b> | <b>Placebo</b> | <b>Relative Risk<br/>Reduction</b> | <b>80% Confidence Interval</b> |
|---------------------------------------------------------|----------------------------|----------------|------------------------------------|--------------------------------|
| Quartile 1: $\leq 5.71 \times 10^3/\mu\text{L}$         | 1/19 (5.3%)                | 2/22 (9.1%)    | 42.10%                             | -155.7% to 87.6%               |
| Quartile 2: $>5.71 - \leq 8.17 \times 10^3/\mu\text{L}$ | 0/17 (0.0%)                | 6/25 (24.0%)   | 100.00%                            | 52.9% to 100.0%                |
| Quartile 3: $>8.17 - \leq 12.6 \times 10^3/\mu\text{L}$ | 6/20 (30.0%)               | 4/21 (19.0%)   | -57.50%                            | -251.8% to 26.3%               |
| Quartile 4: $> 12.6 \times 10^3/\mu\text{L}$            | 10/27 (37.0%)              | 3/13 (23.1%)   | -60.50%                            | -284.0% to 21.8%               |
| ANC count: $\leq 8.17 \times 10^3/\mu\text{L}$          | 1/36 (2.8%)                | 8/47 (17.0%)   | 83.7%                              | 39.5% to 95.5%                 |

**Supplementary table 8: Severity scores (mean [standard deviation]) related to first EAC-determined PA pneumonia through 21 days post-dose in subjects with EAC-determined PA pneumonia**

|                   | <b>MEDI3902<br/>1500 mg<br/>(n=19)</b> | <b>Placebo<br/>(n=15)</b> |
|-------------------|----------------------------------------|---------------------------|
| <b>CPIS</b>       |                                        |                           |
| Baseline*         | 3.7 (1.3)                              | 3.2 (1.3)                 |
| Day 1 of onset    | 6.5 (1.3)                              | 5.8 (2.2)                 |
| Day of resolution | 4.3 (1.7)                              | 3.5 (2.3)                 |
| <b>SOFA</b>       |                                        |                           |
| Baseline*         | 5.9 (2.6)                              | 4.5 (1.9)                 |
| Day 1 of onset    | 8.8 (3.7)                              | 5.5 (3.2)                 |
| Day of resolution | 5.4 (2.8)                              | 3.4 (2.8)                 |

CPIS=Clinical Pulmonary Infection Score. EAC=Endpoint Adjudication Committee.  
PA=*Pseudomonas aeruginosa*. SOFA=Sequential Organ Failure Assessment.

\*Baseline indicates last assessment before the dose.

**Supplementary table 9: Change from baseline (mean [standard deviation]) in cellular and protein markers of inflammation through day 8 (all subjects, mITT)**

|                                                    | <b>MEDI3902<br/>1500 mg<br/>(n=85)</b> | <b>Placebo<br/>(n=83)</b> |
|----------------------------------------------------|----------------------------------------|---------------------------|
| WBC, 10 <sup>3</sup> cells/μL                      | -0.30 (6.74)                           | -0.13 (3.95)              |
| Neutrophils, 10 <sup>3</sup> cells/μL              | -0.12 (6.55)                           | 0.03 (4.10)               |
| Lymphocytes, 10 <sup>3</sup> cells/μL*             | 0.03 (0.66)                            | 0.10 (0.78)               |
| Monocytes, 10 <sup>3</sup> cells/μL <sup>†</sup>   | -0.01 (0.39)                           | 0.06 (0.48)               |
| Eosinophils, 10 <sup>3</sup> cells/μL <sup>‡</sup> | 0.03 (0.21)                            | 0.02 (0.23)               |
| Basophils, 10 <sup>3</sup> cells/μL <sup>§</sup>   | -0.01 (0.07)                           | 0.00 (0.08)               |
| Serum procalcitonin, μg/L                          | 1.65 (13.74)                           | 0.13 (1.70)               |
| Serum CRP, mg/dL                                   | -3.76 (16.94)                          | -1.49 (19.39)             |

CRP=c-reactive protein. mITT=modified intent-to-treat. SD=standard deviation. WBC=white blood cell.

\*Baseline values were 1.30 (0.72) × 10<sup>3</sup> cells/μL for MEDI3902 1500 mg and 1.37 (0.82) × 10<sup>3</sup> cells/μL for placebo; <sup>†</sup>baseline values were 0.82 (0.48) × 10<sup>3</sup> cells/μL for MEDI3902 1500 mg and 0.76 (0.35) × 10<sup>3</sup> cells/μL for placebo; <sup>‡</sup>baseline values were 0.22 (0.29) × 10<sup>3</sup> cells/μL for MEDI3902 1500 mg and 0.27 (0.28) × 10<sup>3</sup> cells/μL for placebo; <sup>§</sup>baseline values were 0.05 (0.06) × 10<sup>3</sup> cells/μL for MEDI3902 1500 mg and 0.05 (0.06) × 10<sup>3</sup> cells/μL for placebo.

For baseline values for WBC, neutrophils, procalcitonin, and CRP, please see table 1.

**Supplementary table 10: Change from baseline in cellular and protein markers of inflammation through day of clinical resolution for subjects with EAC-determined PA pneumonia\* (mITT)**

|                                                                    | <b>MEDI3902<br/>1500 mg<br/>(n=19)</b> | <b>Placebo<br/>(n=15)</b> |
|--------------------------------------------------------------------|----------------------------------------|---------------------------|
| Mean (SD) WBC, 10 <sup>3</sup> cells/ $\mu$ L* <sup>†</sup>        |                                        |                           |
| Day 1 of onset                                                     | 1.84 (6.88)                            | 1.45 (5.98)               |
| Day 4 of onset                                                     | -0.69 (7.94)                           | -0.11 (2.53)              |
| Day of resolution                                                  | -2.67 (5.75)                           | 0.22 (3.58)               |
| Mean (SD) neutrophils, 10 <sup>3</sup> cells/ $\mu$ L <sup>‡</sup> |                                        |                           |
| Day 1 of onset                                                     | 0.64 (4.46)                            | 1.77 (6.68)               |
| Day 4 of onset                                                     | 0.67 (7.37)                            | 0.26 (2.66)               |
| Day of resolution                                                  | -2.50 (5.37)                           | -0.46 (4.15)              |
| Mean (SD) lymphocytes, 10 <sup>3</sup> cells/ $\mu$ L <sup>§</sup> |                                        |                           |
| Day 1 of onset                                                     | 0.07 (0.57)                            | -0.08 (0.44)              |
| Day 4 of onset                                                     | 0.003 (0.64)                           | 0.31 (0.47)               |
| Day of resolution                                                  | 0.23 (0.54)                            | 0.56 (0.54)               |
| Mean (SD) monocytes, 10 <sup>3</sup> cells/ $\mu$ L <sup>¶</sup>   |                                        |                           |
| Day 1 of onset                                                     | 0.16 (0.52)                            | 0.02 (0.41)               |
| Day 4 of onset                                                     | 0.12 (0.32)                            | -0.02 (0.29)              |
| Day of resolution                                                  | 0.04 (0.40)                            | 0.01 (0.42)               |
| Mean (SD) eosinophils, 10 <sup>3</sup> cells/ $\mu$ L <sup>#</sup> |                                        |                           |
| Day 1 of onset                                                     | 0.03 (0.46)                            | -0.06 (0.16)              |
| Day 4 of onset                                                     | 0.15 (0.36)                            | -0.03 (0.13)              |
| Day of resolution                                                  | 0.17 (0.53)                            | -0.02 (0.16)              |
| Mean (SD) basophils, 10 <sup>3</sup> cells/ $\mu$ L**              |                                        |                           |
| Day 1 of onset                                                     | -0.02 (0.08)                           | -0.01 (0.03)              |
| Day 4 of onset                                                     | -0.004 (0.07)                          | 0.04 (0.05)               |

|                                                  |              |              |
|--------------------------------------------------|--------------|--------------|
| Day of resolution                                | -0.01 (0.08) | 0.01 (0.03)  |
| Mean (SD) serumprocalcitonin, µg/L <sup>††</sup> |              |              |
| Day 1 of onset                                   | -0.03 (4.31) | 0.42 (0.61)  |
| Day 4 of onset                                   | -0.37 (1.27) | 0.46 (0.90)  |
| Day of resolution                                | -1.42 (4.44) | 0.08 (0.19)  |
| Mean (SD) serumCRP, mg/dL <sup>‡‡</sup>          |              |              |
| Day 1 of onset                                   | 4.36 (5.88)  | 9.01 (10.10) |
| Day 4 of onset                                   | -1.21 (6.87) | 5.27 (11.17) |
| Day of resolution                                | -3.12 (2.98) | -4.04 (6.32) |

CRP=c-reactive protein. mITT=modified intent-to-treat. SD=standard deviation. WBC=white blood cell.

\*Includes data collected through day 49 for subjects with EAC-determined *P. aeruginosa* pneumonia with onset through day 22; <sup>†</sup>baseline values were 16.49 (5.38) ×10<sup>3</sup> cells/µL for MEDI3902 1500 mg and 13.63 (10.32) ×10<sup>3</sup> cells/µL for placebo; <sup>‡</sup>baseline values were 14.16 (5.39) ×10<sup>3</sup> cells/µL for MEDI3902 1500 mg and 9.35 (5.09) ×10<sup>3</sup> cells/µL for placebo; <sup>§</sup>baseline values were 1.07 (0.67) ×10<sup>3</sup> cells/µL for MEDI3902 1500 mg and 0.99 (0.52) ×10<sup>3</sup> cells/µL for placebo; <sup>¶</sup>baseline values were 0.76 (0.41) ×10<sup>3</sup> cells/µL for MEDI3902 1500 mg and 0.66 (0.33) ×10<sup>3</sup> cells/µL for placebo; <sup>#</sup>baseline values were 0.26 (0.26) ×10<sup>3</sup> cells/µL for MEDI3902 1500 mg and 0.24 (0.34) ×10<sup>3</sup> cells/µL for placebo; <sup>\*\*</sup>baseline values were 0.06 (0.06) ×10<sup>3</sup> cells/µL for MEDI3902 1500 mg and 0.04 (0.04) ×10<sup>3</sup> cells/µL for placebo; <sup>††</sup>baseline values were 2.16 (3.49) µg/L for MEDI3902 1500 mg and 0.26 (0.16) µg/L placebo; <sup>‡‡</sup>baseline values were 10.71 (7.31) mg/dL for MEDI3902 1500 mg and 9.34 (6.99) mg/dL for placebo.

**Supplementary table 11: Subgroups by Baseline Disease (mITT)**

| Characteristics          |     | Interaction p-value <sup>a</sup> | MEDI3902 1500mg (n=85) | MEDI3902 500mg (n=16) | Placebo (n=83) | RRR <sup>b</sup> | 80% CI <sup>c</sup> |
|--------------------------|-----|----------------------------------|------------------------|-----------------------|----------------|------------------|---------------------|
| Severe COPD <sup>c</sup> | Yes | 0.643                            | 2/4 (50.0%)            | 0/1                   | 1/4 (25.0%)    | -100.0%          | (-544.3%, 47.8%)    |
|                          | No  |                                  | 17/81 (21.0%)          | 2/15 (13.3%)          | 13/78 (16.7%)  | -25.9%           | (-95.7%, 19.8%)     |
| Antibiotics usage        | Yes | 0.083                            | 15/59 (25.4%)          | 2/14 (14.3%)          | 9/63 (14.3%)   | -78.0%           | (-195.4%, 4.9%)     |
|                          | No  |                                  | 2/20 (10.0%)           | 0/1                   | 4/14 (28.6%)   | 65.0%            | (-4.4%, 88.2%)      |
| Previous PA infections   | Yes | 0.015                            | 11/25 (44.0%)          | 1/7 (14.3%)           | 4/31 (12.9%)   | -241.0%          | (-594.2%, -70.6%)   |
|                          | No  |                                  | 8/60 (13.3%)           | 1/9 (11.1%)           | 10/51 (19.6%)  | 32.0%            | (-22.1%, 62.0%)     |

<sup>a</sup> the interaction p-value is obtained from Poisson regression with robust variance, including terms of treatment group, subgroup being tested, and treatment by subgroup interaction.

<sup>b</sup> Relative risk reduction (MEDI3902 1500mg versus placebo) and 80% confidence interval (CI) based on unconditional confidence interval on ratio proportions.

<sup>c</sup> Severe COPD = Severe COPD Global Initiative for Chronic Obstructive Lung Disease (GOLD) III or IV

COPD = Chronic Obstructive Pulmonary Disease, mITT=modified intent-to-treat.

Supplementary figure 1: Study design

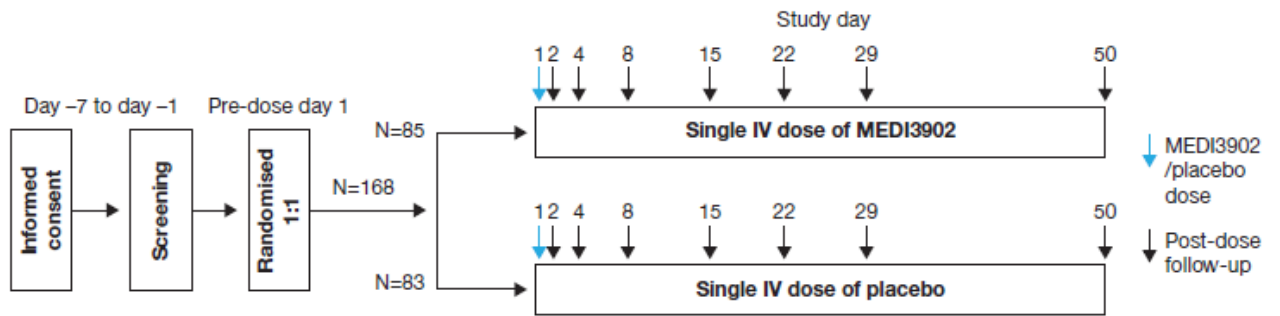

Patients were randomised following positive PCR to identify *P. aeruginosa* colonisation in the lower respiratory tract.

IV=intravenous. PCR=polymerase chain reaction.

**Supplementary figure 2. Cumulative incidence function for EAC-determined PA pneumonia with death as a competing risk (mITT)**

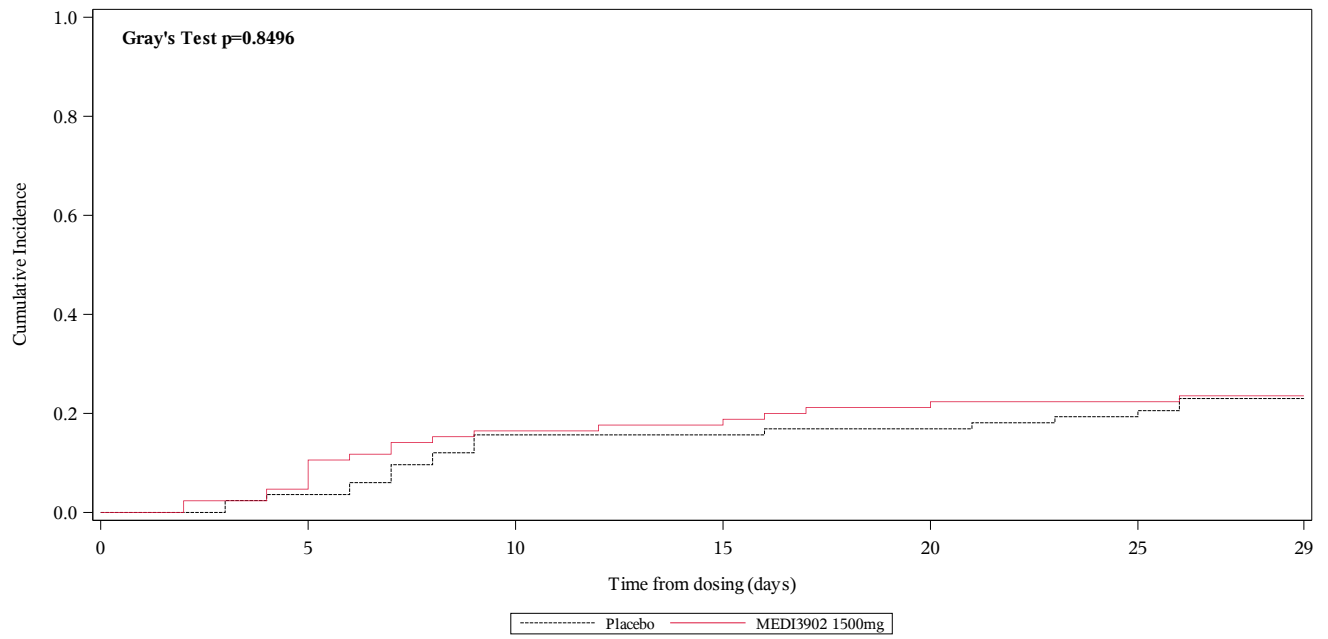

EAC= Endpoint Adjudication Committee. mITT =modified intention-to-treat population



**Supplementary figure 3: Impact of baseline covariates on MEDI3902 efficacy against PA pneumonia in the overall study (post-hoc analysis, mITT)**

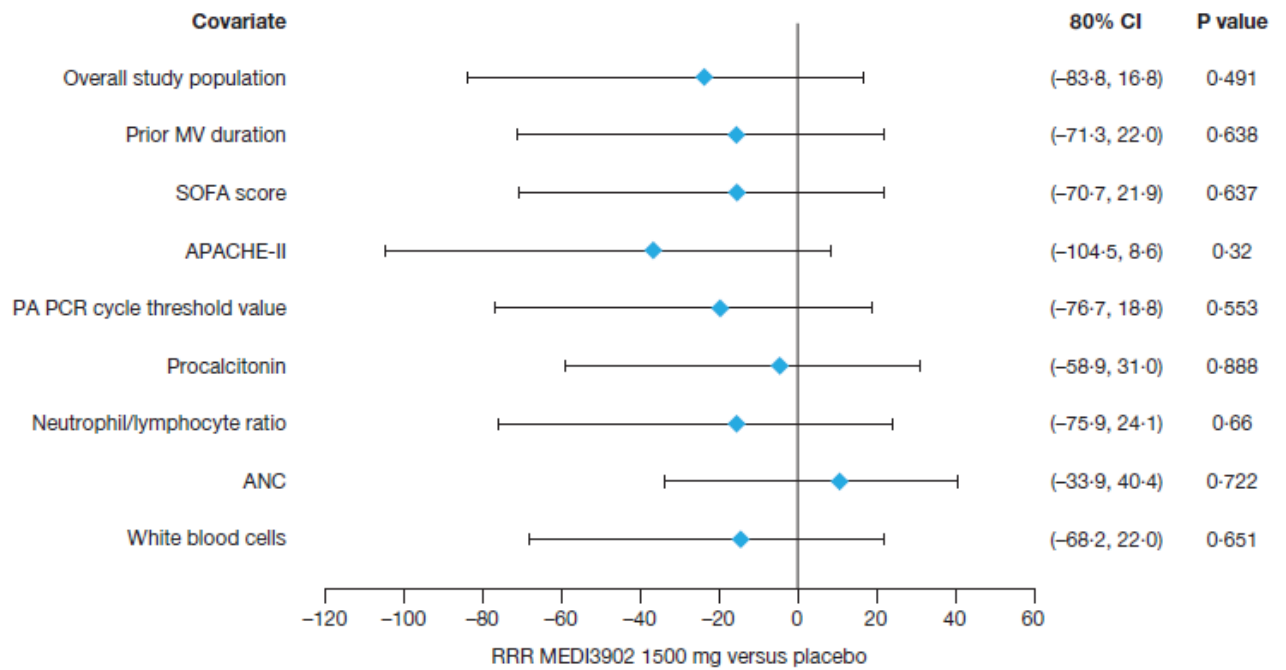

RRR MEDI3902 1500 mg versus placebo and 80% CI. ANC=absolute neutrophil count. APACHE-II=Acute Physiology and Chronic Health Evaluation-II. CI=confidence interval. MV=mechanical ventilation. mITT=modified intent-to-treat population. PCR=polymerase chain reaction. RRR=relative risk reduction. SOFA=Sequential Organ Failure Assessment.

**Supplementary figure 4: Correlation between anti-cytotoxicity (a) or opsonophagocytic killing activity (b) and serum concentrations of MEDI3902 following 1500 mg dosing**

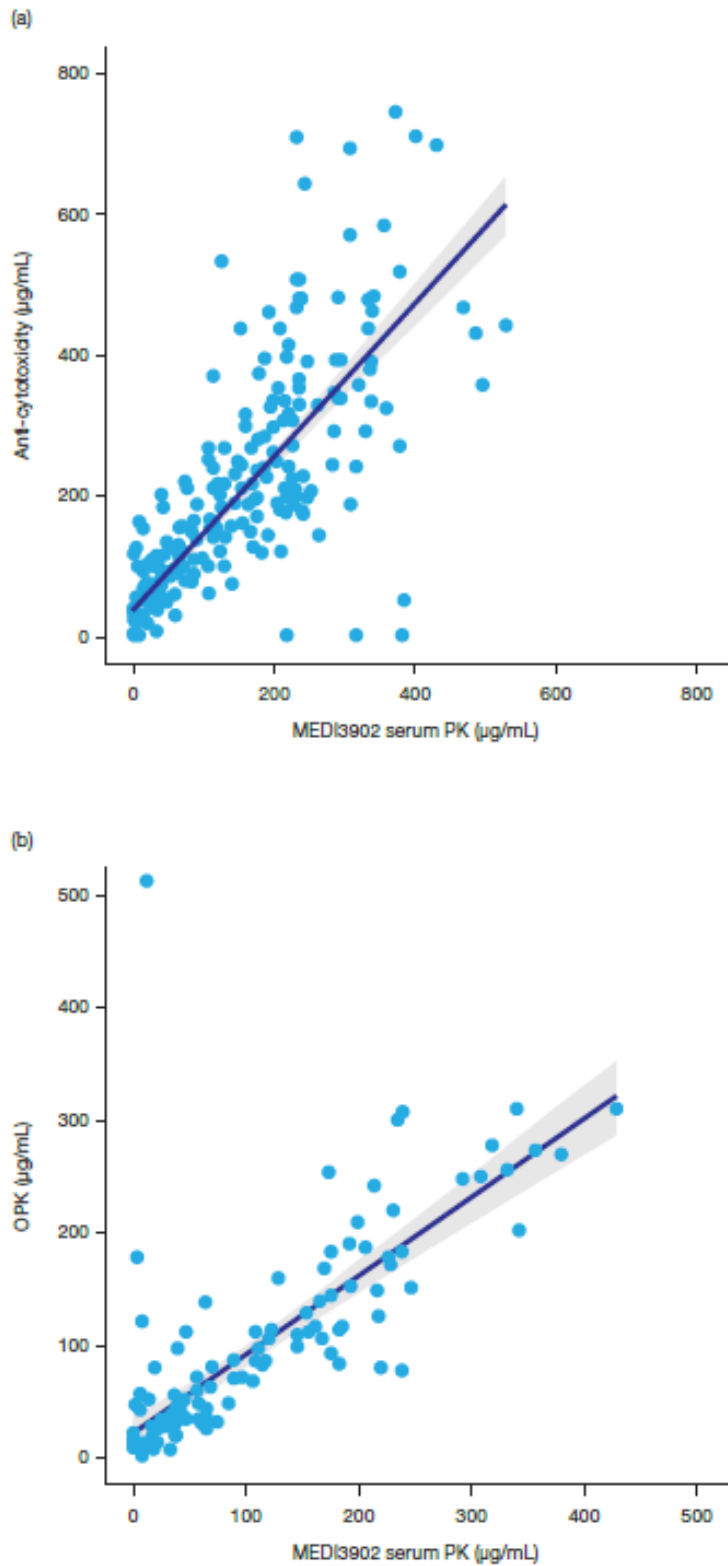

OPK=opsonophagocytic killing activity. PK=pharmacokinetics.

Supplementary figure 5: MEDI3902 1500 mg endotracheal aspirate pharmacokinetic (PK) by visit.

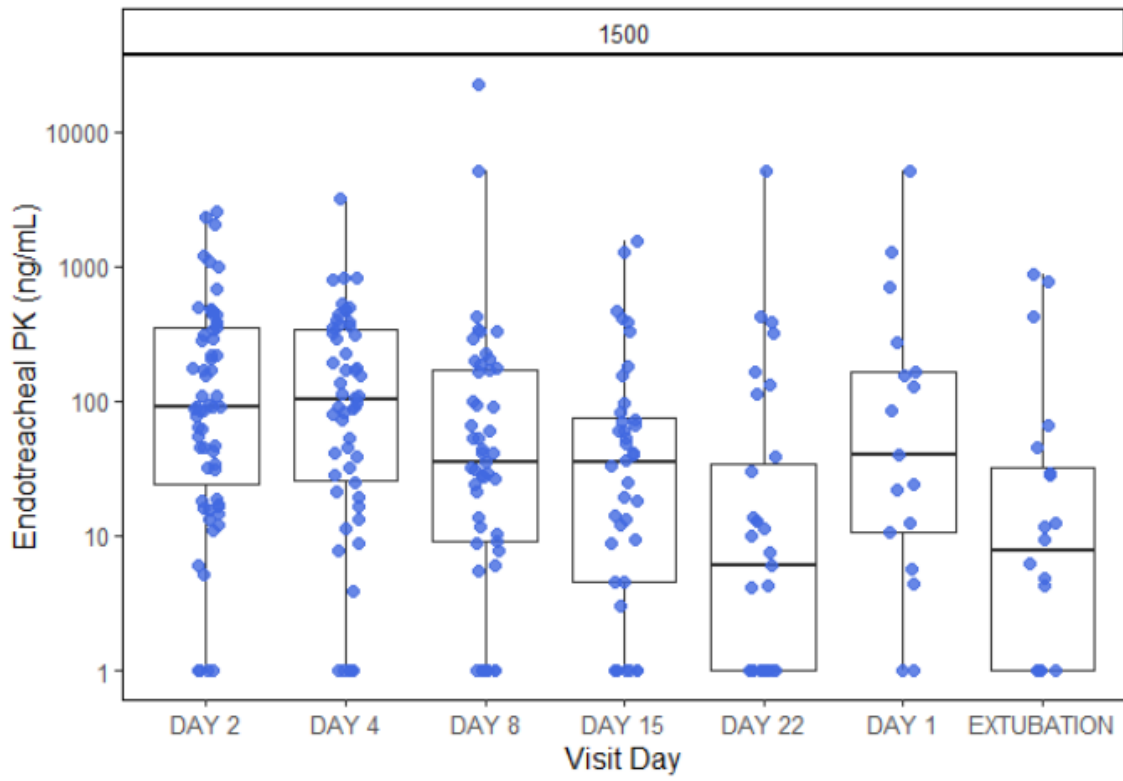

**Supplementary figure 6: Exposure–response relationship between MEDI3902 1500 mg AUC<sub>0–21</sub> and the likelihood of developing PA pneumonia**

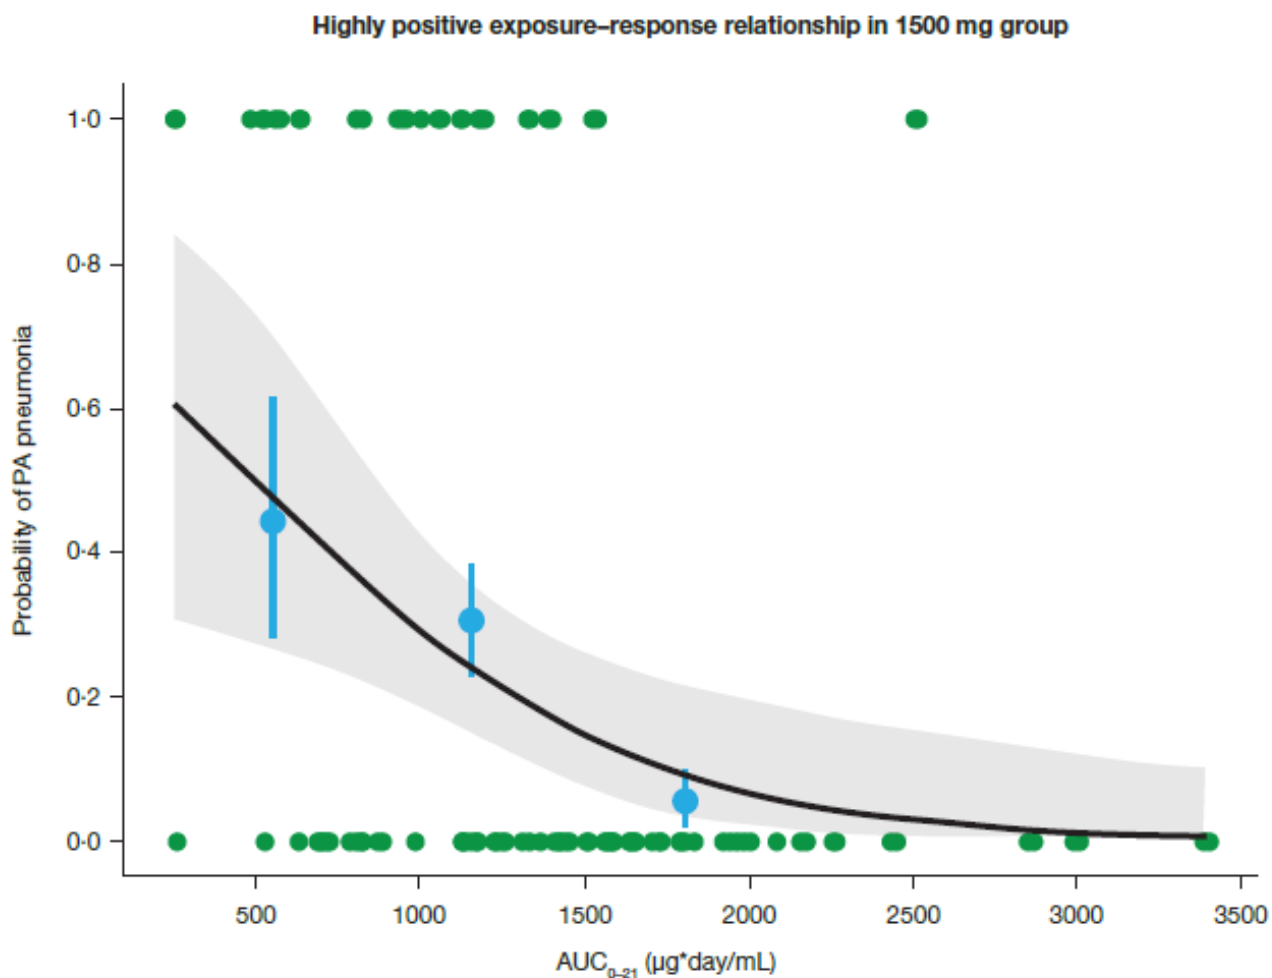

Solid black line: the median-predicted probability of PA pneumonia. Grey shades: 90% confidence interval of the predicted probability of PA pneumonia. Green dots: observed data with  $y=0$  indicating no PA pneumonia within 21 days and  $y=1$  indicating PA pneumonia onset within 21 days. Blue dots and error bars: observed proportion ( $\pm$ SE) of subjects with PA pneumonia by tertiles of AUC<sub>0–21</sub>.

AUC<sub>0–21</sub>=the area under the concentration–time curve from time zero to 21 days post-dose. PA=*P. aeruginosa*. SE=standard error.
